# Supplementary material
Source: PubMed Central journal article supplement (PMC2808494)

Biophysical Journal, Volume 98

**Supporting Material**

**Folding Simulations of a De Novo Designed Protein with  $\beta\alpha\beta$ Fold**

Yifei Qi, Yongqi Huang, Huanhuan Liang, Zhirong Liu, and Luhua Lai

# Folding Simulations of a De Novo Designed Protein with $\beta\alpha\beta$ Fold

Yifei Qi,<sup>†</sup> Yongqi Huang,<sup>†</sup> Huanhuan Liang, Zhirong Liu,<sup>\*</sup> and Luhua Lai<sup>\*</sup>

## Supplementary Information

TABLE S1 Protein fragments studied in this work

| Protein       | Description                                                                                         | PDB  | Residue range | Length | Detection method |
|---------------|-----------------------------------------------------------------------------------------------------|------|---------------|--------|------------------|
| NTL9          | N-terminal domain of ribosomal protein L9                                                           | 1CQU | Met1-Ala39    | 39     | NMR              |
| CI2           | Chymotrypsin inhibitor 2                                                                            | 2CI2 | Leu20-Gly83   | 64     | X-Ray            |
| E3BD<br>F166W | <i>Bacillus stearothermophilus</i> peripheral subunit binding domain F166W mutant                   | 1W4E | Asn126-Gly170 | 45     | NMR              |
| BBL<br>H166W  | <i>Escherichia coli</i> 2-oxoglutarate dehydrogenase peripheral subunit binding domain H166W mutant | 2BTH | Gln126-Ala170 | 45     | NMR              |
| DS119         | Designed peptide with a $\beta\alpha\beta$ structure                                                | 2KI0 | Gln4-Asp36    | 33     | NMR              |
| Psb41         | Peripheral subunit-binding domain of pyruvate dehydrogenase multi-enzyme complex                    | 2PDD | Ala3-Ala43    | 41     | NMR              |
| HP36          | Headpiece subdomain of chicken villin                                                               | 1VII | Met41-Phe76   | 36     | NMR              |
| BBL           | <i>Escherichia coli</i> 2-oxoglutarate dehydrogenase peripheral subunit binding domain              | 1BBL | Leu12-Leu48   | 37     | NMR              |
| SH3           | Sarcoma homology 3 domain                                                                           | 1FMK | Thr85-Asp141  | 57     | X-Ray            |
| Protein L     | IgG-binding domain of protein L                                                                     | 2PTL | Val18-Gly78   | 61     | NMR              |

FIGURE S1 The change of the solvent accessible surface area of the hydrophobic core in the all atom simulation.

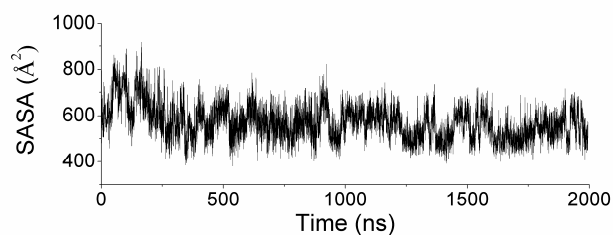

FIGURE S2 Distance between the indole rings of W9 and W34.

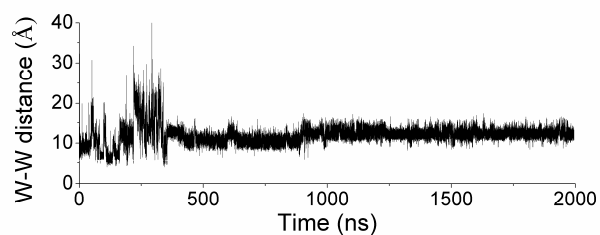

FIGURE S3 A typical folding trajectory from coarse-grained simulations under transition temperature. The total native contacts were decomposed into contacts inside the  $\alpha$ -helix (*Helix*), contacts between the N-terminal  $\beta$ -strand and the  $\alpha$ -helix (*N-Beta*), contacts between the C-terminal  $\beta$ -strand and the  $\alpha$ -helix (*C-Beta*), and contacts between the N- and C-terminal  $\beta$ -strands (*Beta-Sheet*). The dot line indicates the folding transition.

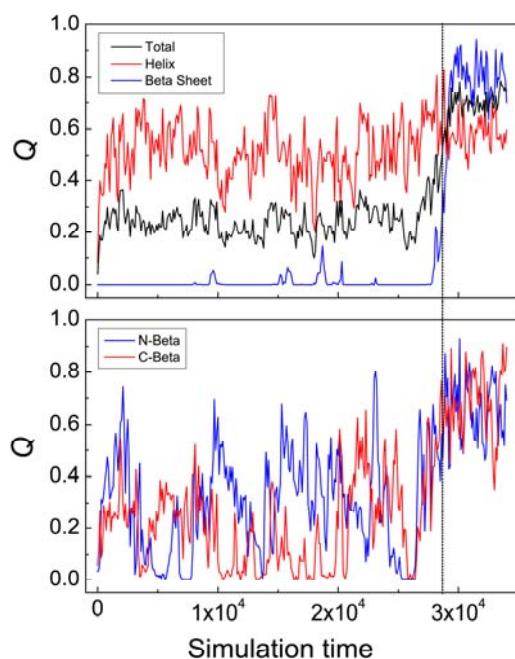

Supplement: mmc1.pdf [file mmc1.pdf]
